# Supplementary material
Source: Springer Nature journal article supplement (https://www.springermedizin.de/resource/supplementary/13054_2010_8526_MOESM1_ESM.pdf/9732162)

**A****Oxygenation index**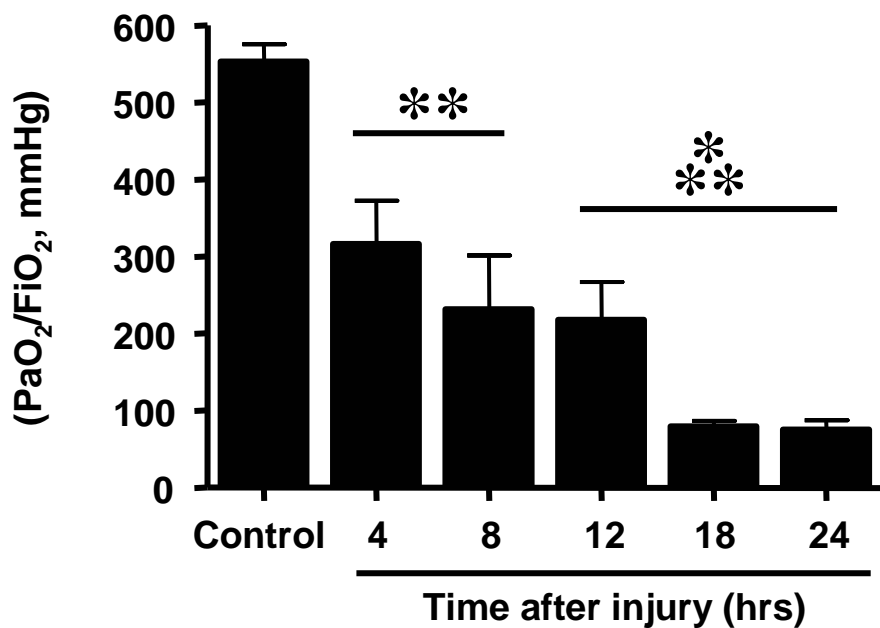**B****Shunt fraction**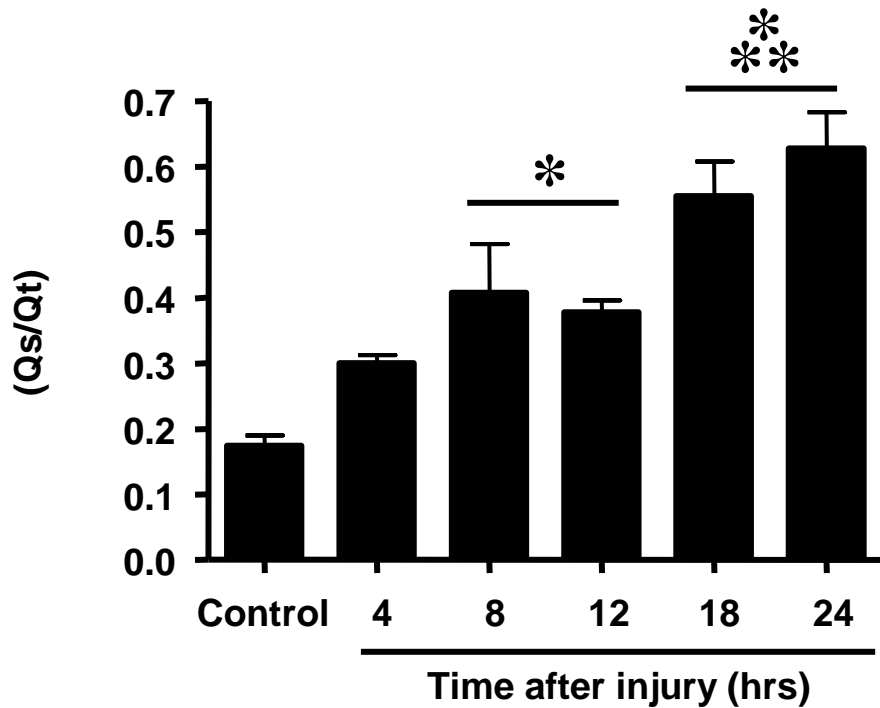

Supplement: MOESM1 [file 9732162]
